# Supplementary material for: Association of MICA with rheumatoid arthritis independent of known HLA-DRB1risk alleles in a family-based and a case control study
Source: Springer Nature journal article supplement (doi:10.1186/ar2683), 2009-05-01
Supplement: 13075_2008_2523_MOESM1_ESM.pdf [file 13075_2008_2523_MOESM1_ESM.pdf]

**Additional data file 1: Distribution of *HLA-DRB1* alleles in the analyzed RA cohorts**

a)

| <b><i>HLA-DRB1</i> allele</b> | <b>First French cohort</b> | <b>Second French cohort</b> |
|-------------------------------|----------------------------|-----------------------------|
| DRB1*0101                     | 16.0%                      | 9.5%                        |
| DRB1*0102                     | 1.0%                       | 1.0%                        |
| DRB1*01other <sup>+</sup>     | 1.0%                       | 0.5%                        |
| DRB1*03                       | 1.0%                       | 8.5%                        |
| DRB1*0401                     | 23.0%                      | 28.0%                       |
| DRB1*0402                     | 0.5%                       | 0.0%                        |
| DRB1*0403                     | 1.0%                       | 0.0%                        |
| DRB1*0404                     | 4.5%                       | 6.5%                        |
| DRB1*0405                     | 4.0%                       | 3.0%                        |
| DRB1*0407                     | 0.0%                       | 0.5%                        |
| DRB1*0408                     | 1.0%                       | 3.5%                        |
| DRB1*07                       | 9.5%                       | 7.0%                        |
| DRB1*08                       | 1.0%                       | 0.5%                        |
| DRB1*0901/902                 | 3.0%                       | 0.5%                        |
| DRB1*1001                     | 3.0%                       | 3.5%                        |
| DRB1*11                       | 5.5%                       | 6.5%                        |
| DRB1*12                       | 0.5%                       | 0.5%                        |
| DRB1*13                       | 8.5%                       | 6.0%                        |
| DRB1*14                       | 1.5%                       | 2.0%                        |
| DRB1*15                       | 2.5%                       | 11.0%                       |
| DRB1*16                       | 4.5%                       | 1.5%                        |

b)

| <b><i>HLA-DRB1</i> allele</b> | <b>German cohort</b> |
|-------------------------------|----------------------|
| DRB*01                        | 16.3%                |
| DRB*02                        | 9.6%                 |
| DRB*03                        | 6.7%                 |
| DRB*0401                      | 20.8%                |
| DRB*0402                      | 3.9%                 |
| DRB*0404                      | 3.4%                 |
| DRB*0405                      | 3.9%                 |
| DRB*0407                      | 3.9%                 |
| DRB*0408                      | 0.6%                 |
| DRB*07                        | 9.6%                 |
| DRB*08                        | 2.2%                 |
| DRB*09                        | 1.1%                 |
| DRB*10                        | 1.7%                 |
| DRB*11                        | 6.2%                 |
| DRB*12                        | 2.8%                 |
| DRB*13                        | 6.7%                 |
| DRB*14                        | 0.6%                 |

a) Allelic frequencies of *HLA-DRB1* in French index patients. Each French family cohort consisted of 100 trio families. +rare *HLA-DRB1* variants other than DRB\*0101 and DRB\*0102; b) Allelic frequencies of *HLA-DRB1* in German patients (n=90)
