# Supplementary material for: Association of MICA with rheumatoid arthritis independent of known HLA-DRB1 risk alleles in a family-based and a case control study
Source: PubMed Central journal article supplement (PMC2714103; doi:10.1186/ar2683), 2009-05-01
Supplement: ar2683-S3.pdf [file ar2683-S3.pdf]

Additional data file 3: Details of conditional logistic regression model of all French families when *MICA-250* is either included (Model 1) or excluded (Model2):

**Model 1**

| Model Term | OR (95% CI)       | p-value  |
|------------|-------------------|----------|
| S3P        | 3.31 (2.17-5.16)  | 1.68E-09 |
| S2         | 5.75 (3.44-10.06) | 1.21E-14 |

| Likelihood ratio: | degree of freedom | p-value  |
|-------------------|-------------------|----------|
| 82.8              | 2                 | 4.25E-10 |

**Model 2**

| Model Term       | OR (95% CI)      | p-value  |
|------------------|------------------|----------|
| S3P              | 3.69 (2.39-5.82) | 1.20E-10 |
| S2               | 5.65 (3.34-9.99) | 8.73E-14 |
| <i>MICA-250A</i> | 0.56 (0.38-0.83) | 2.81E-03 |

| Likelihood ratio: | degree of freedom | p-value  |
|-------------------|-------------------|----------|
| 92.4              | 3                 | 6.31E-10 |

**Likelihood-Ratio-Test model 2 vs. Model 1.: p=0.002**

The odds ratio is for transmission of the indicated haplotype in comparison to the reference allele. For the *HLA-DRB1*-locus, allele L was used as reference. *HLA-DRB1* classification is according to Tezenas Du Montcel(7) (see Material and Methods).
