# Supplementary material for: Association of MICA with rheumatoid arthritis independent of known HLA-DRB1 risk alleles in a family-based and a case control study
Source: PubMed Central journal article supplement (PMC2714103; doi:10.1186/ar2683), 2009-05-01
Supplement: ar2683-S4.pdf [file ar2683-S4.pdf]

Additional data file 4: Details of the logistic regression model of the German case/control cohort when MICA-250 is either included (Model 1) or excluded (Model2):

**Model 1**

| Model Term | OR (95% CI)      | p-value  |
|------------|------------------|----------|
| S3P        | 2.1 (1.33-3.37)  | 1.26E-03 |
| S2         | 3.52 (1.98-6.46) | 6.00E-06 |

| Likelihood ratio: | degree of freedom | p-value  |
|-------------------|-------------------|----------|
| 58.4              | 3                 | 4.18E-10 |

**Model 2**

| Model Term | OR (95% CI)      | p-value  |
|------------|------------------|----------|
| S3P        | 2.14 (1.34-3.45) | 0.001    |
| S2         | 3.23 (1.81-5.92) | 2.90E-05 |
| MICA-250A  | 0.6 (0.37-0.96)  | 0.032    |

| Likelihood ratio: | degree of freedom | p-value  |
|-------------------|-------------------|----------|
| 63.7              | 4.0               | 6.93E-10 |

**Likelihood-Ratio-Test model 2 vs. Model 1.: p=0.02**

The odds ratio is for susceptibility to RA for the indicated alleles in an additive model. For the *HLA-DRB1*-locus, allele L was used as reference. *HLA-DRB1* classification is according to Tezenas Du Montcel(7) (see Material and Methods).
